# Supplementary material for: Gold nanoparticles in aqueous solutions: influence of size and pH on hydrogen dissociative adsorption and Au(iii) ion reduction
Source: Royal Society of Chemistry journal article supplement (doi:10.1039/c6cp01996j), 2016-01-01
Supplement: c6cp01996j1.pdf [file c6cp01996j1.pdf]

**Supporting Information for**  
**Gold nanoparticles in aqueous solutions: influence of size and pH on hydrogen dissociative adsorption and**  
**Au(III) ions reduction**

B.G. Ershov,\* E.V. Abkhalimov,\* R.D. Solovov, V.I. Roldughin

A.N. Frumkin Institute of Physical Chemistry and Electrochemistry, Russian Academy of Science, Leninsky pr. 31-4, Moscow, 119071, Russia

\*Corresponding authors: [ershov@ipc.rssi.ru](mailto:ershov@ipc.rssi.ru), [abkhalimov@ipc.rssi.ru](mailto:abkhalimov@ipc.rssi.ru)

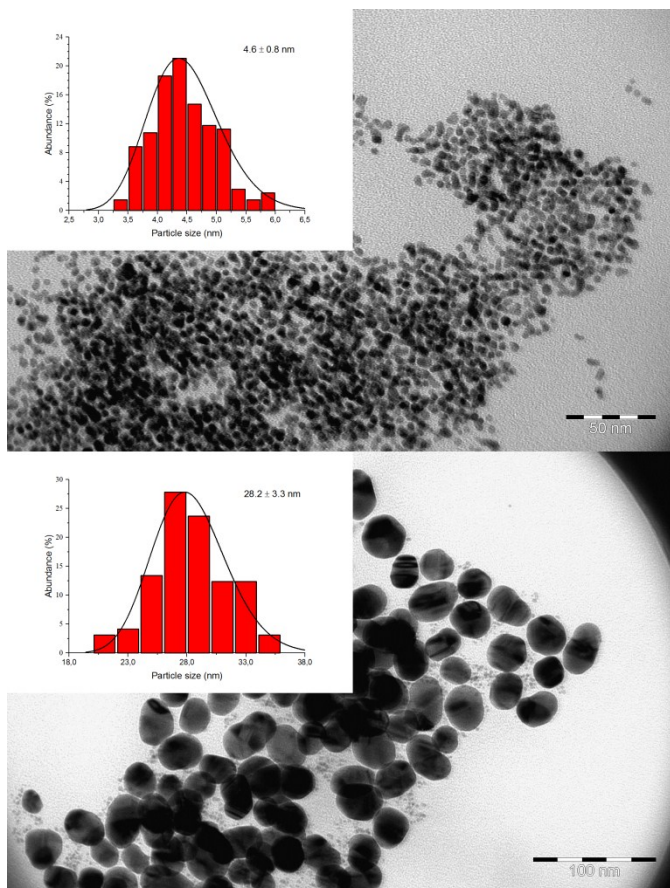

**Fig. S1.** TEM images and size distributions of the gold nanoparticles with different size.

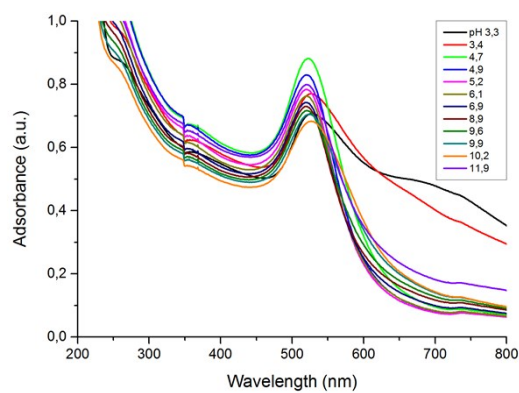

**Fig. S2.** Optical absorption spectra of gold nanoparticles with average size a 4.6 nm at various pH.

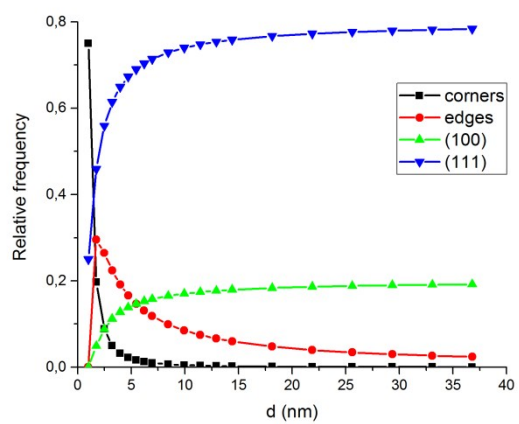

Fig. S3. Dependence of relative frequency of surface atoms upon diameter of gold dodecahedron.

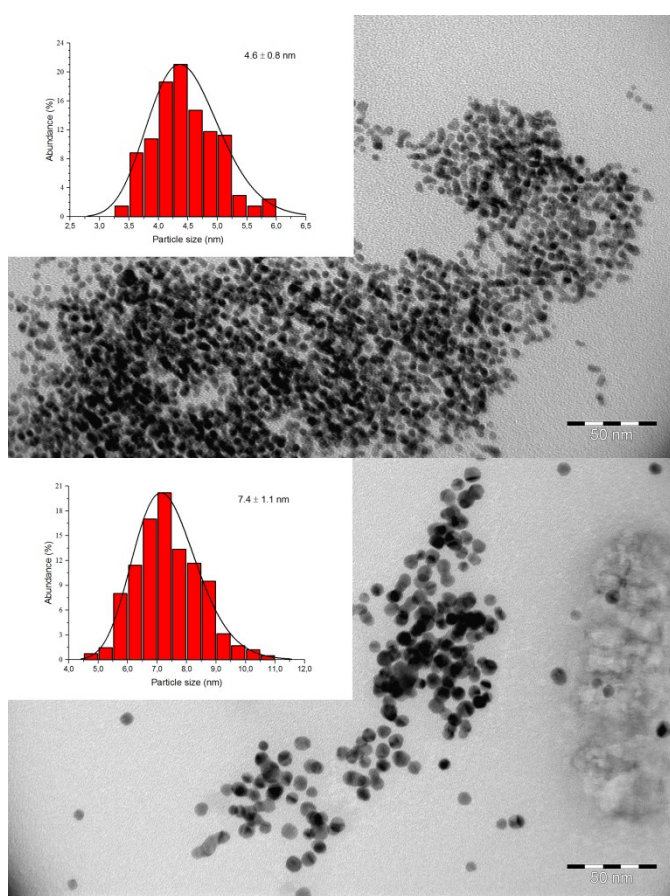

Fig. S4. TEM images and size distributions of gold nanoparticle before and after catalytic reaction.
